# Supplementary material for: Risk factors for Blastocystis infection in HIV/AIDS patients with highly active antiretroviral therapy in Southwest China
Source: Infect Dis Poverty. 2019 Oct 17;8:89. doi: 10.1186/s40249-019-0596-7 (PMC6796344; doi:10.1186/s40249-019-0596-7)
Supplement: Supplementary file 2 — Additional file 2. The sequence of Blastocystis in this study. [file 40249_2019_596_MOESM2_ESM.meg]

#mega
!Title 序列+参考株最终整理;
!Format DataType=DNA indel=-;

#H53
TGAGAACAATGTACAACTCTTATCGATAAGCCATTGGAGGGCAAGTCTGGTGCCAGCAGC
CGCGGTAATTCCAGCTCCAATAGCGTATATTAACGTTGTTGCAGTTAAAAAGCTCGTAGT
TGAAGTGTGGGTG---A-TCGCTGTTGTGAGACTTCGGTCTCTCGACAGTAAGTCACC--
--CCCTTCCAGTATCCAGT-----AGTGGG---TATTCAGTTACTT--------------
-----ACTACTGTGTGTTG-GTCCTTTACTGTGAGAAAATTAAAGTGTTCAAAGCAGGCG
TT--------------TGCTTGAATAGATTAGCATGGAATAATAATTGAAGGCTTTCGTG
TTCGATTTGATTGGTTTG--TTCATGGAAGCAA-GGTTAAAAGGAACAGTTGGGGGTATT
CATATTCACTAGTTAGAGGTGAAATTCTCGGATTTATGGAAGATGAACAAGTGCGAAAGC
ATTTACCAAGGATGTTTTCATTAATCAAGAACGAAAGCTAGGGGATCGAAG-AGGATTAG
ATACCCTCGTAGTCTTAGCTATAAACGATACCGACTAGGGGTTAGTAGAG----------
---------GTCAAAGT--------------GTCTTTATTAGTACCTTATGAGAAATCAA
AGTCTTT-GGGTTCCGGGGGGAGTATGGTCGCAAGGCTGAAACTTAAAGGAATTGACGGA
AGGGCACCCACCAGGAGTGGAGCCTGCGGCTTAATTT-GACTCA-CACGGGGAAACTTAC
CAGGTCCAGACATAGGAAGGATTGACAGATTGAT--------------------------
------------------------------------------------------------
------------------------------------------------------------
------------------------------------------------------------
------------------------------------------------------------
------------------------------------------------------------
---

#H56
-GAGAACAATGTACAAATGTTATCGATAAACAATTGGAGGGCAAGTCTGGTGCCAGCAGC
CGCGGTAATTCCAGCTCCAATAGCGTATATTAACGTTGTTGCAGTTAAAAAGCTCGTAGT
TGAATTGAAGTGAACTT-GGATTGATGTGATCTTCGGATGACGTGAATCAAAGTTGA---
--CTCTTTCCAAAGTCAATA----CATTGG---TATTCATTTATCTT-------------
-----TGTATTGTGT-TTG-GTCATTTACTGTGAGAAAATTAGAGTGTTCAAAGCAGACG
TT--------------TGTTTGAATACATTAGCATGGAATAATCATATAAGGCTTTCATG
TT-GATTTGATTGGTTTG--AATATGGAAGCAA-GATTAAAAGGGACAGTTGGGGGTATT
CATATTCAATAGTCAGAGGTGAAATTCTGGGATTTATGGAAGATGAACAAGTGCGAAAGC
ATTTACCAAGGATGTTTTCATTAATCAAGAACGAAAGTTAGGGGATCGAAG-AGGATTAG
ATACCCTCGTAGTCTTAACTATAAACGATACCGACTAGGGGTTAGTAATG----------
---------GTCATTGT--------------GTGTTTACTAGTACCTTATGAGAAATCAA
AGTCTTT-GGGTTCCGGGGGGAGTATGGTCGCAAGGCTGAAACTTAAAGGAATTGACGGA
AGGGCACC-ACCAGGAGTGGAGCCTGCGGCTTAATTT-GACTCAACACGGGGAAACTTAC
CAGGTCCAGACATAGGAAGGATAGACAGAACAA-AGCTCTTTCTTGATTCTATGGGTGGT
GGTGCATGGCCGCTCTTAGTTGGTGGATTGATTTGTCAGGCTAATTCCGATAACGAACGA
GACCTCCTCCTACTAGATAGATATGTA----------------TATCTTCG---------
------------GATATATAA-TATCTTCTTAGA--GGGA--------------------
------------------------------------------------------------
------------------------------------------------------------
---

#H60
TGAGAACAATGTACAAATGTTATCGATAAACAATTGGAGGGCAAGTCTGGTGCCAGCAGC
CGCGGTAATTCCAGCTCCAATAGCGTATATTAACGTTGTTGCAGTTAAAAAGCTCGTAGT
TGAATTGAAGTGAACTT-GGATTGATGTGATCTTCGGATGACGTGAATCAAAGTTGA---
--CTCTTTCCAAAGTCAATA----CATTGG---TATTCATTTATCTT-------------
-----TGTATTGTGT-TTG-GTCATTTACTGTGAGAAAATTAGAGTGTTCAAAGCAGACG
TT--------------TGTTTGAATACATTAGCATGGAATAATCATATAAGGCTTTCATG
TT-GATTTGATTGGTTTG--AATATGGAAGCAA-GATTAAAAGGGACAGTTGGGGGTATT
CATATTCAATAGTCAGAGGTGAAATTCTGGGATTTATGGAAGATGAACAAGTGCGAAAGC
ATTTACCAAGGATGTTTTCATTAATCAAGAACGAAAGTTAGGGGATCGAAG-AGGATTAG
ATACCCTCGTAGTCTTAACTATAAACGATACCGACTAGGGGTTAGTAATG----------
---------GTCATTGT--------------GTGTTTACTAGTACCTTATGAGAAATCAA
AGTCTTT-GGGTTCCGGGGGGAGTATGGTCGCAAGGCTGAAACTTAAAGGAATTGACGGA
AGGGCACC-ACCAGGAGTGGAGCCTGCGGCTTAATTT-GACTCAACACGGGGAAACTTAC
CAGGTCCAGACATAGGAAGGATAGACAGAACAA-AGCTCTTTCTTGATTCTATGGGTGGT
GGTGCATGGCCGTTCTTAGTTGGTGGATTGATTTGTCAGGCTAATTCCGATAACGAACGA
GACCTCCTCCTACTAAATAGATATGTA----------------TATCTTCG---------
------------GATATATAAATATCTTCTTAGA--GGGACACTATACACA-AAGTGTAG
GG-AAGCTGGAGGCAATAACAGGTCTGTGATGCCCTTAGATGTCCTGGGCTGCACGCGCG
CGACACTGATTGATTCAGCAAGTG------------------------------------
---

#H82
--------ATGTACAACTCTTATCGATAAGCCATTGGAGGGCAAGTCTGGTGCCAGCAGC
CGCGGTAATTCCAGCTCCAATAGCGTATATTAACGTTGTTGCAGTTAAAAAGCTCGTAGT
TGAAGTGTGGGTG---A-TCGCTATTGTGAGACTTCGGTCTCTCGACAGTAAGTCACC--
--CCCTTCCAGTATCCAGT-----AGTGGG---TATTCAGTTACTT--------------
-----ACTATTGTGTGTTG-GTCCTTTACTGTGAGAAAATTAGAGTGTTCAAAGCAGGCG
TT--------------TGCTTGAATAGATTAGCATGGAATAATAATTGAAGGCTTTCGTG
TTCGATTTGATTGGTTTG--TTCATGGAAGCAA-GGTTAAAAGGAACAGTTGGGGGTATT
CATATTCACTAGTTAGAGGTGAAATTCTCGGATTTATGGAAGATGAACAAGTGCGAAAGC
ATTTACCAAGGATGTTTTCATTAATCAAGAACGAAAGCTAGGGGATCGAAG-AGGATTAG
ATACCCTCGTAGTCTTAGCTATAAACGATACCGACTAGGGGTTAGTAGAG----------
---------GTCAAAGT--------------GTCTTTATTAGTACCTTATGAGAAATCAA
AGTCTTT-GGGTTCCGGGGGGAGTATGGTCGCAAGGCTGAAACTTAAAGGAATTGACGGA
AGGGCACC-ACCAGGAGTGGAGCCTGCGGCTTAATTT-GACTCAACACGGGGAAACTTAC
CAGGTCCAGACATAGGAAGGATTGACAGATTGATAGCTCTTTCTTGATTCTATGGGTGGT
GGTGCATGGCCGTTCTTAGTTGGTGGAGTGATTTGTCTGGCTAATTCCGATAACGAACGA
GACCTCCGCCT-TTAACTAGTGACGTG----------------TATT-------------
------------GTGATATGCGTTGCTTCTTATA--GGGACACTATATGTA-AAATGTAG
GG-AAGCTGGAGGCAATAACAGGTCTGTGATGCCCTTAGATGTTCTGGGCTGCCA-----
------------------------------------------------------------
---

#H93
TGAGAACAATGTACAAATGTTATCGATAAACAATTGGAGGGCAAGTCTGGTGCCAGCAGC
CGCGGTAATTCCAGCTCCAATAGCGTATATTAACGTTGTTGCAGTTAAAAAGCTCGTAGT
TGAATTGAAGTGAACTT-GGATTGATGTGATCTTCGGATGACGTGAATCAAAGTTGA---
--CTCTTTCCAAAGTCAATA----CATTGG---TATTCATTTATCTT-------------
-----TGTATTGTGT-TTG-GTCATTTACTGTGAGAAAATTAGAGTGTTCAAAGCAGACG
TT--------------TGTTTGAATACATTAGCATGGAATAATCATATAAGGCTTTCATG
TT-GATTTGATTGGTTTG--AATATGGAAGCAA-GATTAAAAGGGACAGTTGGGGGTATT
CATATTCAATAGTCAGAGGTGAAATTCTGGGATTTATGGAAGATGAACAAGTGCGAAAGC
ATTTACCAAGGATGTTTTCATTAATCAAGAACGAAAGTTAGGGGATCGAAG-AGGATTAG
ATACCCTCGTAGTCTTAACTATAAACGATACCGACTAGGGGTTAGTAATG----------
---------GTCATTGT--------------GTGTTTACTAGTACCTTATGAGAAATCAA
AGTCTTT-GGGTTCCGGGGGGAGTATGGTCGCAAGGCTGAAACTTAAAGGAATTGACGGA
AGGGCACC-ACCAGGAGTGGAGCCTGCGGCTTAATTT-GACTCAACACGGGGAAACTTAC
CAGGTCCAGACATAGGAAGGATAGACAGAACAA-AGCTCTTTCTTGATTCTATGGGTGGT
GGTGCATGGCCGTTCTTAGTTGGTGGATTGATTTGTCAGGCTAATTCCGATAACGAACGA
GACCTCCTCCTACTAAATAGATATGTA----------------TATCTTCG---------
------------GATATATAAATATCTTCTTAGA--GGGACACTATACACA-AAGTGTAG
GG-AAGCTGGAGGCAATAACAGGTCTGTGATGCCCTTAGATGTCCTGGGCTGCACGCGCG
CGACACTGATTGATTCAGCAAGTGGCTG--GTTCGAGA----------------------
---

#H175
------------------------------------------------------------
------------------------------------------------------------
------------------------------------------------------------
------------------------------------------------------------
------------------------------------------------------------
--------------------------------------ATAATAAGATTGGCTTTTCATA
GTCTATTTTTTGGTTTGT---TTATGAAAAGCAAGATAAATAGGGTCAGTTGGGGGTATT
CATATTCAATAGCTAGAGGGGAAATTCTATGATTTATGGAAGATGAAATAGTGCGAAAGC
ATTTCCCAAGGATGTTTTCATTAATCAAGAAAGAAAGCTAGGGGATCAAAG-AGGATTAG
ATACCCTCGTAGTGTTATCTATAAACGATACCGACTAGGAGTTAGTAGATGA--------
---------TCCAATG---------------GTGTCTATTAGTACCTTATGAGAAATCAA
AGTCTTT-GGGTTCCGGGGGGAGTATGGTCGCAAGGCTGAAACTTAAAGGAATTGACGGA
AGGGCACC-CCCAGGAGTGGAGCCTGCGGCTTAATTT-GACTCAACACGGGGAAACTTAC
CAGGTCCAGACATAGGAAGGATTGACAGATTGATAGCTCTTTTTTGATTTTATGGGTGGG
GGGGCATGGCCGTTCTTAGTTGGGGGAGTGATTTGTTTGGTTTATTCCGATAACGAACGA
GACTTCCCCCTATTAGTTGGATGAAATGGG--------ATTTTTAGCCCCAT--------
------------TGTAATTTTTCATCAGCTTAGA--GGGACACTGTGCGTTTGAGTACGG
GG-AAGCTGGAAGCAATAACAGGTCTGTGATGCCCTTAGATGTTCTGGGCTGCACGCGCG
CGACACTGAACTATTCAACGAGTATCTG--AGTCGATAGACTTGGGAAATC---------
---

#H192
TATGCTACATGTGCATTCGTTGTCTATGT-CAATTGGAGGGCAAGTCGGGTGCCAGCAGC
CGCGGTAATTCCAGCTCCAATAGCGTATATTAACGTTGTTGCAGTTAAAAAGCTCGTAGT
TGAAGTTTAGATAATTTATTGAAAGTGTTTGTATTCGTACATTCTACTTTTATGTAAGTT
ATCGACATCCAGGTGGGTGC----CATGGT---TCCGCAAGGAATTG-------------
------TGGTACTAGACTG-GTCATTTACTGTGAGAAAATTAGAGTGTTTAAAGCAGACT
TTT---------ATTCTATTTGAATAGATTAACATGGAATAATAAGATTGGCTTT-CATA
GTCCATTTTTTGGGTTGG---TTATGAAA-GCAAGATTAATAAGGACAGTTGGGGGTATT
CATATTCAATAACTAGAGGTGAAATTCTATGAATTATGGAAGAAGAACTAGTGCGAAAGC
ATTTACCAAGGATGTTTTCATTAATCAAGAACGAAAGCTAGGGGATCAAAG-AAGATTAA
ATACCCTCCTAATCTTAACTATTAACGATACCCACTAGGAATTAGTAGATGA--------
---------TCCAATG---------------GTGGCTATTAATACCTTATGAAAAATCAA
AGTCTTT-GGGTTCCGGGGGGAGTATGGTCGCAAGGGTGAAACTTAAAGGAATTGACGGA
AGGGCACC-ACCAGGAGTGGAACCTGCCGCTTAATTT-GACTCAACACGGGGAAACTTAC
CAGGTCCAGACATAAGAAGGATTGACAGAATGATAGCTCCTTCCTGAATCCATGGGTGGT
GGTGCATGGCCGTTCTTAGTTGGTGGAATGATTTGGCTGGTTTATTCCGATAACGAACGA
AACTTCCGCCTATTAGTTGGATGAAATGGGG-------ATTTTTAGCCCCAT--------
------------TGGTATTTTTCATCAACTTAAAAGGGAACCTTGTGCTTTTGAATAACG
GG-AAACCTGGAAC----------------------------------------------
------------------------------------------------------------
---

#H207
TGAGAACAACGTACAAACCTTATCGATAAACAATTGGAGGGCAAGTCTGGTGCCAGCAGC
CGCGGTAATTCCAGCTCCAATAGCGTATATTAACGTTGTTGCAGTTAAAAAGCTCGTAGT
TGAAATGAAGGGTAGTT-GTGTAATGAATACATTCGTGTATTTTGTTATTCTACTACC--
--CTCCTTCTAAATTCGATA----TATGAG---TATTAATTTACTTG-------------
-----TATATGGT-T-TTA-GACGTTTACTGTGAGAAAATTAGAGTGTTCAAAGCAGGCA
TT--------------TGCTTGAATATATTAGCATGGAATAATCATGTATGATTTTCATG
ATGTATTTGATTGGTTTGG-TTCATGAGAATAA-GATTAAAAGGGACAGTTGGGGGTATT
CATATTCAATAGTCAGAGGTGAAATTCTCGGATTTATGGAAGATGAACAAGTGCGAAAGC
ATTTACCAAGGATGTTTTCATTAATCAAGAACGAAAGTTAGGGGATCGAAG-AGGATTAG
ATACCCTCGTAGTCTTAACTATAAACGATACCGACTAGAGGTTAGTGAAG----------
---------GTCATTGT--------------GTCTTGACTAGTATCTTATGAGAAATCAA
AGTCTTT-GGGTTCCGGGGGGAGTATGGTCGCAAGGCTGAAACTTAAAGGAATTGACGGA
AGGGCACC-ACCAGGAGTGGAGCCTGCGGCTTAATTT-GACTCAACACGGGAAAACTTAC
CAGGTCCAGACATAGGAAGGATAGACAGATTAA-AGCTCTTTCTTGATTCTATGGGTGGT
GGTGCATGGCCGTTCTTAGTTGGTGGATTGATTTGTCAGGCTAATTCCGATAACGAACGA
GACCTCCGCCTGCTAAATGGTTTTCTA----------------TAGT-------------
------------ATTCTATAGGAATCCTCTTAGA--GGGACACTATACATA-AAGTATAG
GGGAAGCTGGAGGCAATAACAGGTCTGTGATGCCCTTAGATGTCCTGGGCTGCACGCGCG
CGACAC------------------------------------------------------
---

#H274
------------------------------------------------------------
------------------------------------------------------------
------------------------------------------------------------
------------------------------------------------------------
------------------------------------------------------------
------------------------------------------------------------
------------------------------------------------------------
----------------AGTCGAAATTTTATGATATATGGAAGATGCAATAGTGTGAAAGC
ATTTTCCAAGGATGTTTTCATTAATCCAGACCGAAAGGTATGGGATCAAAG-AGGGTTAG
ATACCCTCGTAGTGTTAGCTATAAACGATACCGGCTAGGAGTTAGTAGATGA--------
---------TCCAATG---------------GTGTCTATTAGTACCCTATGAGAAATCAA
AGTCTTT-GGGTTCCGGGGGGAGTATGGTCGCAAGGCTGAAACTTAAAGGAATTGACGGA
AGGGCACC-CCCACGAGTGGAGCCTGCGGCTTAATTT-GACTCAACACGGGGAAACTTAC
CACGTCCAGACATAGGAAGGATTGACAGATTGATAGCTCTTTCTTGATTCTATGGGTGGT
GGTGCATGGCCGTTCTTAGTTGGTGGAGTGATTTGTCTGGTTTATTCCGATAACGAGCGA
GACTTCCGCCTATTAGTTGGATGAAATGGG--------ATTTTTAGCCCCAC--------
------------TGTAATTTTTCATCAGCTTAGA--GGGACACTGTGCGTTTGAGTACAG
GG-AAGCTGGAAGCAATAACAGGTCTGTGATGCCCTTAGATGTTCTGGGCTGCACGCGCG
CGACACTGAACTATTCAACGAGTATCTG--AGTCGATAGACTTGGGAAATCTTTGAAAAT
AGT

#H290
TGAGAACA-TGTACAACTCTTATCGATAAGCCATTGGAGGGCAAGTCTGGTGCCAGCAGC
CGCGGTAATTCCAGCTCCAATAGCGTATATTAACGTTGTTGCAGTTAAAAAGCTCGTAGT
TGAAGTGTGGGTG---A-TCGCTGTTGTGAGACTTCGGTCTCTCGACAGTAAGTCACC--
--CCCTTCCAGTATCCAGT-----AGTGGG---TATTCACTTACTT--------------
-----ACTACTGTGTGTTG-GTCCTTTACTGTGAGAAAATTAGAGTGTTCAAAGCAGGCG
TT--------------TGCTTGAATAGATTAGCATGGAATAATAATTGAAGGCTTTCGTG
TTCGATTTGATTGGTTTG--TTCATGGAAGCAA-GGTTAAAAGGAACAGTTGGGGGTATT
CATATTCACTAGTTAGAGGTGAAATTCTCGGATTTATGGAAGATGAACAAGTGCGAAAGC
ATTTACCAAGGATGTTTTCATTAATCAAGAACGAAAGCTAGGGGATCGAAG-AGGATTAG
ATACCCTCGTAGTCTTAGCTATAAACGATACCGACTAGGGGTTAGTAGAG----------
---------GTCAAAGT--------------GTCTTTATTAGTACCTTATGAGAAATCAA
AGTCTTT-GGGTTCCGGGGGGAGTATGGTCGCAAGGCTGAAACTTAAAGGAATTGACGGA
AGGGCACC-ACCAGGAGTGGAGCCTGCGGCTTAATTTTGACTCAACACGGGGAACTT---
------------------------------------------------------------
------------------------------------------------------------
------------------------------------------------------------
------------------------------------------------------------
------------------------------------------------------------
------------------------------------------------------------
---

#H333
-----------TACAAACCTTATCGATAAACAATTGGAGGGCAAGTCTGGTGCCAGCAGC
CGCGGTAATTCCAGCTCCAATAGCGTATATTAACGTTGTTGCAGTTAAAAAGCTCGTAGT
TGAAATGAAGGGTAGTT-GTGTAATGAATACATTCGTGTATTTTGTTATTCTACTACC--
--CTCCTTCTAAATTCGATA----TATGAG---TATTAATTTACTTG-------------
-----TATATGGT-T-TTA-GACCTTTACTGTGAGAAAATTAGAGTGTTCAAAGCAGGCA
TT--------------TGCTTGAATATATTAGCATGGAATAATCATGTATGATTTTCATG
ATGTATTTGATTGGTTTGG-TTCATGAGAATAA-GATTAAAAGGGACAGTTGGGGGTATT
CATATTCAATAGTCAGAGGTGAAATTCTCGGATTTATGGAAGATGAACAAGTGCGAAAGC
ATTTACCAAGGATGTTTTCATTAATCAAGAACGAAAGTTAGGGGATCGAAG-AGGATTAG
ATACCCTCGTAGTCTTAACTATAAACGATACCGACTAGAGGTTAGTGAAG----------
---------GTCATTGT--------------GTCTTGACTAGTATCTTATGAGAAATCAA
AGTCTTT-GGGTTCCGGGGGGAGTATGGTCGCAAGGCTGAAACTTAAAGGAATTGACGGA
AGGGCACC-ACCAGGAGTGGAGCCTGCGGCTTAATTT-GACTCAACACGGGAAAACTTAC
CAGGTCCAGACATAGGAAGGATAGACAGATTAA-AGCTCTTTCTTGATTCTATGGGTGGT
GGTGCATGGCCGTTCTTAGTTGGTGGATTGATTTGTCAG-CTAATTCCGATAACGAACGA
GACCTCCGCCCTGCTAATGGGTTTCTA----------------TAAT-------------
------------ATTCTATAGGAATCCCCT-AGA--GGGGCACTATACATA-AGGAA-AG
GG-AAGCTG---------------------------------------------------
------------------------------------------------------------
---

#H359
TGAGAACAACGTACAAACCTTATCGATAAACAATTGGAGGGCAAGTCTGGTGCCAGCAGC
CGCGGTAATTCCAGCTCCAATAGCGTATATTAACGTTGTTGCAGTTAAAAAGCTCGTAGT
TGAAATGAAGGGTAGTT-GTGTAATGAATACATTCGTGTATTTTGTTATTCTACTACC--
--CTCCTTCTAAATTCGATA----TATGAG---TATTAATTTACTTG-------------
-----TATATGGT-T-TTA-GACCTTTACTGTGAGAAAATTAGAGTGTTCAAAGCAGGCA
TT--------------TGCTTGAATATATTAGCATGGAATAATCATGTATGATTTTCATG
ATGTATTTGATTGGTTTGG-TTCATGAGAATAA-GATTAAAAGGGACAGTTGGGGGTATT
CATATTCAATAGTCAGAGGTGAAATTCTCGGATTTATGGAAGATGAACAAGTGCGAAAGC
ATTTACCAAGGATGTTTTCATTAATCAAGAACGAAAGTTAGGGGATCGAAG-AGGATTAG
ATACCCTCGTAGTCTTAACTATAAACGATACCGACTAGAGGTTAGTGAAG----------
---------GTCATTGT--------------GTCTTGACTAGTATCTTATGAGAAATCAA
AGTCTTT-GGGTTCCGGGGGGAGTATGGTCGCAAGGCTGAAACTTAAAGGAATTGACGGA
AGGGCACC-ACCAGGAGTGGAGCCTGCGGCTTAATTT-GACTCAACACGGGAAAACTTAC
CAGGTCCAGACATAGGAAGGATAGACAGATTAA-AGCTCTTTCTTGATTCTATGGGTGGT
GGTGCATGGCCGTTCTTAGTTGGTGGATTGATTTGTCAGGCTAATTCCGATAACGAACGA
GACCTCCGCCTGCTAAATGGTTTTCTA----------------TAGT-------------
------------ATTCTATAGGAATCCTCTTAGA--GGGACACTATACATA-AAGTATAG
GG-AAGCTGGAGGCAATAACAGGTCTGTGATGCCCTTAGATGTCCTGGGCTGCACGCGCG
CGACACTGATTCATTCAACAAGTGGCTG--AATCGATAGATTTGGCAAATCTTTTGAAAA
TGA

#KC148206_Blastocystis_hominis_Subtype_14
TGAGAACAATGTAAAAGAGTTATCGATAAACAATTGGAGGGCAAGTCTGGTGCCAGCAGC
CGCGGTAATTCCAGCTCCAATAGCGTATATTAACGTTGTTGCAGTTAAAAAGCTCGTAGT
TGAAGTGTGGGGTGAAA--GGATGTG-TGTTCATTTTGAATG--TRTGTCTGGTCAC---
--CCCCTCTCCAATGTGTTAT---TATGGG---TATTAATTTACTTG-------------
-----TAAT-AGCTG-TTG-GTCATTTACTGTGAGAAAATTAGAGTGTTCAAAGCAGGCA
TT--------------TGCTTGAATATATTAGCATGGAATAATAATAAAAGGCTTTTGTG
GTCGATTTAATTGGTTTG--TTCATGAAAGCAA-GATTAATAGGGACAGTTGGGGGTATT
CATATTCAATAGTTAGAGGTGAAATTCTCGGATTTATGGAAGATGAACTAGTGCGAAAGC
ATTTACCAAGGATGTTTTCATTAATCAAGAACGAAAGCTAGGGGATCGAAG-AGGCTTAG
ATACCCTCGTAGTCTTAGCTATAAACTATACCGACTAGGGGTTAGTAGAA----------
---------GTCATTGT--------------GTTTCTATTAGTACCTTATGAGAAATCAA
AGTCTTT-GGGTTCCGGGGGGAGTATGGTCGCAAGGCTGAAACTTAAAGGAATTGACGGA
AGGGCACC-ACCAGGAGTGGAGCCTGCGGCTTAATTT-GACTCAACACGGGGAAACTTAC
CAGGTCCAGACATAGGAAGGATTGACAGATTGATAGCTCTTTCTTGATTCTATGGGTGGT
GGTGCATGGCCGTTCTTAGTTGGTGGAGTGATTTGTCTGGTTAATTCCGATAACGAACGA
GACCTCCGCCTGCTAACTAGGTTTTAT----------------TAGATTT----------
----------------TAGTAAAATCTTCTTAGA--GGGACACTATACGTTTTAGTGTAG
GG-AAGCTGGAGGCAATAACAGGTCTGTGATGCCCTTAGATGTTCTGGGCTGCACGCGCG
CGACACTGATCTATTCAACGAGTGACTG--GATCGATA----------------------
---

#GU256935_Blastocystis_hominis_Subtype_13
TGAGAACAACGCACAATAGTTATCGATAAACAATTGGAGGGCAAGTCTGGTGCCAGCAGC
CGCGGTAATTCCAGCTCCAATAGCGTATATTAACGTTGTTGCAGTTAAAAAGCTCGTAGT
TGAAGTGCGGGGCAGAC--TAGTGTGGTGTTCATT--GAACGC-TGCGTGTGTGTGC---
--CCCCTCTCCAATTTGTTGC---TATGGG---TATTAATTTACTTG-------------
-----TAGT-AATGG-TTG-GTCGTTTACTGTGAGAAAATTAGAGTGTTCAAAGCAGGCA
TT--------------TGCTTGAATATATTAGCATGGAATAATATCAAAAGGCTTTTGTG
GTCGATTTAATTGGTTTG--TTCATGAAAGCAA-GATTAAAAGGGACAGTTGGGGGTATT
CATATTCAATAGTTAGAGGTGAAATTCTCGGATTTATGGAAGATGAACTAGTGCGAAAGC
ATTTACCAAGGATGTTTTCATTAATCAAGAACGAAAGCTAGGGGATCGAAG-AGGCTTAG
ATACCCTCGTAGTCTTAGCTATAAACGATACCGACTAGGGGTTAGTAGAA----------
---------GTCATTGC--------------GTTTCTATTAGTACCTTATGAGAAATCAA
AGTCTTT-GGGTTCCGGGGGGAGTATGGTCGCAAGGCTGAAACTTAAAGGAATTGACGGA
AGGGCACC-ACCAGGAGTGGAGCCTGCGGCTTAATTT-GACTCAACACGGGGAAACTTAC
CAGGTCCAGACATAGGAAGGATTGACAGATTGATAGCTCTTTCTTGATTCTATGGGTGGT
GGTGCATGGCCGTTCTTAGTTGGTGGAGTGATTTGTCTGGTTAATTCCGATAACGAACGA
GACCTCCGCCTGCTAACTAGTGTAGAT----------------TACCTTG----------
---------------GTAGTTTGCGCTTCTTAGA--GGGACACTATACGTATGAGTGTAG
GG-AAGCTGGAGGCAATAACAGGTCTGTGATGCCCTTAGATGTTCTGGGCTGCACGCGCG
CGGCACTGATCTATTCAACGAGTGACTG--GATCGATA----------------------
---

#GU25690_Blastocystis_hominis_Subtype_12
TGAGAACAATGTACAAGAGTTATCGATAAACAATTGGAGGGCAAGTCTGGTGCCAGCAGC
CGCGGTAATTCCAGCTCCAATAGCGTATATTAACGTTGTTGCAGTTAAAAAGCTCGTAGT
TGAAGTGTGGGGTATA----AATGAATTGACTTTTTCAAAGTG-AATGAATGAATAC---
--CCCCTCTCCAATAAGTCTG---TATGGG---TATTAAGTTATTTG-------------
-----TACT-GGCTG-TTG-GTCATTTACTGTGAGAAAATTAGAGTGTTCAAAGCAGGCA
TT--------------TGCTTGAATATGTTAGCATGGAATAATAATAAAAGGCTTTTATG
GTCGATTTAATTGGTTTG--TTCATGAAAGCAA-GATTAAAAGGGACAGTTGGGGGTATT
CATATTCAATAGTTAGAGGTGAAATTCTCGGATTTATGGAAGATGAACTAGTGCGAAAGC
ATTTACCAAGGATGTTTTCATTAATCAAGAACGAAAGCTAGGGGATCGAAG-AGGCTTAG
ATACCCTCGTAGTCTTAGCTATAAACTATACCGACTAGGGGTTAGTAGAA----------
---------GTCATTGT--------------GTTTCTATTAGTACCTTATGAGAAATCAA
AGTCTTT-GGGTTCCGGGGGGAGTATGGTCGCAAGGCTGAAACTTAAAGGAATTGACGGA
AGGGCACC-ACCAGGAGTGGAGCCTGCGGCTTAATTT-GACTCAACACGGGGAAACTTAC
CAGGTCCAGACATAGGAAGGATTGACAGATTGATAGCTCTTTCTTGATTCTATGGGTGGT
GGTGCATGGCCGTTCTTAGTTGGTGGAGTGATTTGTCTGGTTAATTCCGATAACGAACGA
GACCTCCGCCTACTAACTAGTTTATTG----------------TATTTTG----------
---------------ATAGAATAAACTTCTTAGA--GGGACACTATACGTATGAGTGTAG
GG-AAGCTGGAGGCAATAACAGGTCTGTGATGCCCTTAGATGTTCTGGGCTGCACGCGCG
CGACACTGATCTATTCAACGAGTAACTG--GATCGATA----------------------
---

#GU256904_Blastocystis_hominis_Subtype_11
TGAGAACAATGTACAACTCTTATCGATAAACTATTGGAGGGCAAGTCTGGTGCCAGCAGC
CGCGGTAATTCCAGCTCCAATAGCGTATATTAACGTTGTTGCAGTTAAAAAGCTCGTAGT
TGAAGTGTGGATG---T-G-ATGGTCGTTCGGATTCG-TCTGAATGTCCTGAATCATC--
--CCCTTCCAGTGTTCACT-----GATGGG---TATTAATTTACTT--------------
-----GTGAGTGGGTATTG-GTCGTTTACTGTGAGAAAATTAGAGTGTTCAAAGCAGACG
TT--------------TGTTTGAATACATTAGCATGGAATAATAATTGAAGGCTTTCGTG
TTCGATTTGATTGGTTTG--TTCATGGAAGCAA-GGTTAAAAGGAGCAGTTGGGGGTATT
CATATTCAATAGTTAGAGGTGAAATTCTCGGATTTATGGAAGATGAACAAGTGCGAAAGC
ATTTACCAAGGATGTTTTCATTAATCAAGAACGAAAGCTAGGGGATCGAAG-AGGATTAG
ATACCCTCGTAGTCTTAGCTATAAACGATACCGACTAGGGGTTAGTAGAG----------
---------GTCATTGT--------------GTCTTTATTAGTACCTTATGAGAAATCAA
AGTCTTTTGGGTTCCGGGGGGAGTATGGTCGCAAGGCTGAAACTTAAAGGAATTGACGGA
AGGGCACC-ACCAGGAGTGGAGCCTGCGGCTTAATTT-GACTCAACACGGGGAAACTTAC
CAGGTCCAGACATAGGAAGGATTGACAGATTGATAGCTCTTTCTTGATTCTATGGGTGGT
GGTGCATGGCCGTTCTTAGTTGGTGGAGTGATTTGTCTGGCTAATTCCGATAACGAACGA
GACCTCCGCCT-TTAACTAGTAGTTGT----------------TATT-------------
------------TCGATAATCGCTACTTCTTATA--GGGACACTATATGTA-AAATGTAG
GG-AAGCTGGAGGCAATAACAGGTCTGTGATGCCCTTAGATGTTCTGGGCTGCACGCGCG
CGACACTGATCTATTCAACGAGTGGCTG--GGTCGGCA----------------------
---

#GU256903_Blastocystis_hominis_Subtype_11
TGAGAACAATGTACAACTCTTATCGATAAACTATTGGAGGGCAAGTCTGGTGCCAGCAGC
CGCGGTAATTCCAGCTCCAATAGCGTATATTAACGTTGTTGCAGTTAAAAAGCTCGTAGT
TGAAGTGTGGATG---T-G-ATGGTCGTTCGGATTCG-TCTGAATGTCCTGAATCATC--
--CCCTTCCAGTGTTCACT-----GATGGG---TATTAATTTACTT--------------
-----GTGAGTGGGTATTG-GTCGTTTACTGTGAGAAAATTAGAGTGTTCAAAGCAGACG
TT--------------TGTTTGAATACATTAGCATGGAATAATAATTGAAGGCTTTCGTG
TTCGATTTGATTGGTTTG--TTCATGGAAGCAA-GGTTAAAAGGAGCAGTTGGGGGTATT
CATATTCAATAGTTAGAGGTGAAATTCTCGGATTTATGGAAGATGAACAAGTGCGAAAGC
ATTTACCAAGGATGTTTTCATTAATCAAGAACGAAAGCTAGGGGATCGAAG-AGGATTAG
ATACCCTCGTAGTCTTAGCTATAAACGATACCGACTAGGGGTTAGTAGAG----------
---------GTCATTGT--------------GTCTTTATTAGTACCTTATGAGAAATCAA
AGTCTTT-GGGTTCCGGGGGGAGTATGGTCGCAAGGCTGAAACTTAAAGGAATTGACGGA
AGGGCACC-ACCAGGAGTGGAGCCTGCGGCTTAATTT-GACTCAACACGGGGAAACTTAC
CAGGTCCAGACATAGGAAGGATTGACAGATTGATAGCTCTTTCTTGATTCTATGGGTGGT
GGTGCATGGCCGTTCTTAGTTGGTGGAGTGATTTGTCTGGCTAATTCCGATAACGAACGA
GACCTCCGCCT-TTAACTAGTAGTTGT----------------TATT-------------
------------TCGATAATCGCTACTTCTTATA--GGGACACTATATGTA-AAATGTAG
GG-AAGCTGGAGGCAATAACAGGTCTGTGATGCCCTTAGATGTTCTGGGCTGCACGCGCG
CGACACTGATCTATTCAACGAGTGGCTG--GGTCGGCA----------------------
---

#KC148207_Blastocystis_hominis_Subtype_10
TGAGAACAACGCACAACACTTATCGATAAACAATTGGAGGGCAAGTCTGGTGCCAGCAGC
CGCGGTAATTCCAGCTCCAATAGCGTATATTAACGTTGTTGCAGTTAAAAAGCTCGTAGT
TGAAGTGAAGTG----T-GAATCTCTAGGATTTTCGTTAGAATTTCCTTTAGCTTCATA-
--CTCTTTCCAAATAGTTTG----CATGGG---TATTTACTTATCTG-------------
-----TGTATTGCAT-TTG-GTCATTTACTGTGAGAAAATTAGAGTGTTCAAAGCATACG
TT--------------TGTTTGAATACATTAGCATGGAATAATTCGAAAAGGCTTTCATG
TTCGATTTGATTGGTTTG--TTCGTGAAGGCAA-GATTAAAAGGGACAGTTGGGGGTATT
CATATTCAATAGTCAGAGGTGAAATTCTCGGATTTATGGAAGATGAACTAGTGCGAAAGC
ATTTACCAAGGATGTTTTCATTAATCAAGAACGAAAGTTAGGGGATCGAAG-AGGCTTAG
ATACCCTCGTAGTCTTAACTATAAACGATACCGACTAGGGGTTAGTGGAG----------
---------GTCATT-T--------------GTCTCTACTAGTACCTTATGAGAAATCAA
AGTCTTT-GGGTTCCGGGGGGAGTATGGTCGCAAGGCTGAAACTTAAAGGAATTGACGGA
AGGGCACC-ACCAGGAGTGGAGCCTGCGGCTTAATTT-GACTCAACACGGGGAAACTTAC
CAGGTCCAGACATAGGAAGGATAGACAGAACAA-AGCTCTTTCTTGATTCTATGGGTGGT
GGTGCATGGCCGTTCTTAGTTGGTGGATTGATTTGTCAGGCTAATTCCGATAACGAACGA
GACCTCCGCCTACTAAATAGAAAGTTA----------------TAATTC-----------
------------GTTATATC--TTTCTTCTTAGA--GGGACACTATACATG-AAGTGTAG
GG-AAGCTGGAGGCAATAACAGGTCTGTGATGCCCTTAGATGTCCTGGGCTGCACGCGCG
CGACACTGATTGATTCAACAAGTGGCTG--ATTTGAAA----------------------
---

#AY266470_Blastocystis_hominis_Subtype_9
TGAGAAAAATTCAAATCCATTATCGAGGAACAATTGGAGGGCAAGTCTGGTGCCAGCAGC
CGCGGTAATTCCAGCTCCAATAGCGTATATTAAAGTTGTTGCAGTTAAAAAGCTCGTAGT
TGAATTTTATTAATTATATGATATTTATTTTATTTCTTATTTTATAAGTAATAAAATATA
ATTTATTTATATAATTTTTAAATTTATAGATTTTATTAATATATTTTTTAACAAAAATAA
ATTAATAAATAATAATCTATATCATTTACTGTGAAAAAATTAGAGTGTTCAAAGCAAACT
TTTGTAAAAAGTATTTTTTTTGAATATATTAGCATGGAATAATAATATAAGACTTTAGTA
TT--ATATTGTTGGTTGAATAGAACTAAAGTAATGATTAATAGGGACAGTTGTGGGTATT
TATATTTAATTGTCAGAGGTGAAATTCTCGGATTTATGAAAGATAAACAAATGCGAAAGC
ATTTACCAAGGATGTTTTCATTAATCAAGAACGAAAGTTAGGGGATCGAAG-AGGATTAG
ATACCCTCGTAGTCTTAACTATAAACTATACCGACTAGAGATTGGTAAGATACTAATTTT
GTATTATATGTAAAAGTATAGTATAAGAAAGGTATTTATCAGAATGTTATGAGAAATCAA
AGTCTTT-GGGTTCTGGGGGGAGTATGGTCGCAAGGCTGAAACTTAAAGGAATTGACGGA
AGGGCACC-ACCAGGAGTAGAGCCTGCGGCTTAATTT-GACTCAACACGGGGAAACTTAC
CAGGTCCAGACATAGTAAGGATTGACAGATTGATAGTTCTTTCTTGATTCTATGGGTGGT
GGTGCATGGCCGTTCTTAGTTGGTGGAGTAATTTGTCTGGTTAATTCCGATAACGAACGA
GAACTCCGCTTGCTAAATAGTTGATTAGTGAGCTAATAAATTTTAATTTTTTAAAATTGA
TTAGAAATTACTGAATCGTATAAAACTTCTTAGA--AGGACACTGAAT-TAAAAATTCAG
GG-AAGTTGGAGGCAATAACAGGTCTGTGATGCCCTTAGATGTTCTGGGCCGCACGCGCG
CTACACTGATATATTCAACAAGTATTTTTTAATTAATTTGTTTTCTTTATTGAAAATAAA
TTA

#AB070991_Blastocystis_hominis_Subtype_7
TGAGAACAATGTACAATCGTTATCGATAAACAATTGGAGGGCAAGTCTGGTGCCAGCAGC
CGCGGTAATTCCAGCTCCAATAGCGTATATTAACGTTGTTGCAGTTAAAAAGCTCGTAGT
TGAAGTTTAGATAATTTATTGAAAGTGTTTGTATTCGTACATTCTACTTTTATGTAAGTT
ATCGACATCCAGGTGGGTGC----TCTGAT---TCCTTCGGGGGTTA-------------
------GGGTACTAGACTG-GTCATTTACTGTGAGAAAATTAGAGTGTTTAAAGCGGACT
------------GTTCAGTTTGAGTAGATTAGCATGGAATAATAAGATTGGCTTT-CATA
GTCGATTTTTTGGTTTGT---TTATGAAA-GCAAGATTAATAGGGACAGTTGGGGGTATT
CATATTCAATAGCTAGAGGTGAAATTCTATGATTTATGGAAGATGAACTAGTGCGAAAGC
ATTTACCAAGGATGTTTTCATTAATCAAGAACGAAAGCTAGGGGATCAAAG-AGGATTAG
ATACCCTCGTAGTCTTAGCTATAAACGATACCGACTAGGAGTTAGTAGATGA--------
---------TCCAATG---------------GTGTCTATTAGTACCTTATGAGAAATCAA
AGTCTTT-GGGTTCCGGGGGGAGTATGGTCGCAAGGCTGAAACTTAAAGGAATTGACGGA
AGGGCACC-ACCAGGAGTGGAGCCTGCGGCTTAATTT-GACTCAACACGGGGAAACTTAC
CAGGTCCAGACATAGGAAGGATTGACAGATTGATAGCTCTTTCTTGATTCTATGGGTGGT
GGTGCATGGCCGTTCTTAGTTGGTGGAGTGATTTGTCTGGTTTATTCCGATAACGAACGA
GACTTCCGCCTATTAGTTGGATGAAATGGG--------ATTTTTAGCCCCAT--------
------------TGTA-TTTTTCATCAACTTAGA--GGGACACTGTGCGTTTGAGTACGG
GG-AAGCTGGAAGCAATAACAGGTCTGTGATGCCCTTAGATGTTCTGGGCTGCACGCGCG
CGACACTGAACTATTCAACGAGTATCTG--AGTCGATA----------------------
---

#Blastocystis_hominis_Subtype_7_AF408427
TGAGAACAATGTACAATCGTTATCGATAAACAATTGGAGGGCAAGTCTGGTGCCAGCAGC
CGCGGTAATTCCAGCTCCAATAGCGTATATTAACGTTGTTGCAGTTAAAAAGCTCGTAGT
TGAAGTTTAGATAATTTATTGAAAGTGTTTGTATTCGTACATTCTACTTTTATGTAAGTT
ATCGACATCCAGGTGGGTGC----CTTAGC---TCTTTCGGGGGTTA-------------
------GGGTACTAGACTG-GTCATTTACTGTGAGAAAATTAGAGTGTTTAAAGCAGACT
TTT---------ATTCAGTTTGAATAGATTAGCATGGAATAATAAGATTGGCTTT-CATA
GTCGATTTTTTGGTTTGT---TTATGAAA-GCAAGATTAATAGGGACAGTTGGGGGTATT
CATATTCAATAGCTAGAGGTGAAATTCTATGATTTATGGAAGATGAACTAGTGCGAAAGC
ATTTACCAAGGATGTTTTCATTAATCAAGAACGAAAGCTAGGGGATCAAAG-AGGATTAG
ATACCCTCGTAGTCTTAGCTATAAACGATACCGACTAGGAGTTAGTAGATGA--------
---------TCCAATG---------------GTGTCTATTAGTACCTTATGAGAAATCAA
AGTCTTT-GGGTTCCGGGGGGAGTATGGTCGCAAGGCTGAAACTTAAAGGAATTGACGGA
AGGGCACC-ACCAGGAGTGGAGCCTGCGGCTTAATTT-GACTCAACACGGGGAAACTTAC
CAGGTCCAGACATAGGAAGGATTGACAGATTGATAGCTCTTTCTTGATTCTATGGGTGGT
GGTGCATGGCCGTTCTTAGTTGGTGGAGTGATTTGTCTGGTTTATTCCGATAACGAACGA
GACTTCCGCCTATTAGTTGGATGAAATGGG--------ATTTTTAGCCCCAT--------
------------TATT--TTTTCATCAGCTTAGA--GGGACACTGTGCGTTTGAGTACAG
GG-AAGCTGGAAGCAATAACAGGTCTGTGATGCCCTTAGATGTTCTGGGCTGAACGCGCG
CGACACTGAACTATTCAACGAGTATCTG--AGTCGATA----------------------
---

#AB070994_Blastocystis_hominis_Subtype_6
TGAGAAGAAGGTACAAATCATATCGATAAACAATTGGAGGGCAAGTCTGGTGCCAGCAGC
CGCGGTAATTCCAGCTCCAATAGCGTATATTAACGTTGTTGCAGTTAAAAAGCTCGTAGT
TGAAGTTGGATGAGTAT----TTGAATTCAATTTTCGAATTGGATTCAAATCCTTAT---
--CATTTCTAGTAGTTATG-----CTTGGG---TATTCAATTACTTG-------------
-----AGTATGATAG-CTA-GTCATTTACTGTGAGAAAATTAGAGTGTTTAAAGCAGACG
TT--------------TGTTTGAATAGATTAGCATGGAATAATAATGATATGCTT----G
ATTTCATTGATTGGTTAT---GAAAGATAGCAA-GATTAAAAGGGACAGTTGGGGGTATT
CATATTCAATAGTTAGAGGTGAAATTCTCGGATTTATGGAAGATGAACAAATGCGAAAGC
ATTTACCAAGGATGTTTTCATTAATCAAGAACGAAAGCTAGGGGATCAAAGGAGGCTTAG
ATACCCTCGTAGTCTTAGCTATAAACGATACCGACTAGGGCTTAGTAGATA---------
---------TCCAATG---------------GTGTCTATTAGTACCTTGTGAGAAACCAA
AGTCTTT-GGGTTCCGGGGGGAGTATGGTCGCAAGGCTGAAACTTAAAGGAATTGACGGA
AGGGCACC-ACCAGGAGTGGAGCCTGCGGCTTAATTT-GACTCAACACGGGGAAACTTAC
CAGGTCCAGACATAGGAAGGATTGACAGATTGATAGCTCTTTCTTGATTCTATGGGTGGT
GGTGCATGGCCGTTCTTAGTTGGTGGAGTGATTTGTCTGGTTAATTCCGATAACGAACGA
GACCTCCGCCTATTAACTAGATAAAGT----------------AAAT-------------
------------ATGTTTACTTTGTCTTCTTAAA--GGGACACTATACGTTTGAGTATGG
GG-AAGCTGGAGGCAATAACAGGTCTGTGATGCCCTTAGATGTTCTGGGCTGCACGCGCG
CGACACTGAACTATTCAACGAGTGGCTT--GATCGATA----------------------
---

#AB070999_Blastocystis_hominis_Subtype_5
TGAGAACAATGTACAAATGTTATCGATAAACAATTGGAGGGCAAGTCTGGTGCCAGCAGC
CGCGGTAATTCCAGCTCCAATAGCGTATATTAACGTTGTTGCAGTTAAAAAGCTCGTAGT
TGAAATGTGGGATGAA---GTATATGATGAATTTTATATTCAATTATATATTGAT-T---
--CCCCTCTCCAATTTATTAT---TATGGG---TATTAATTTATTTG-------------
-----TAAT-AAGAA-TTG-GTCATTTACTGTGAGAAAATTAGAGTGTTCAAAGCAGGCA
TT--------------TGCTTGAATAGATTAGCATGGAATAATAATAAAAGGCTTTTATG
GTCGATTTAATTGGTTTG--TTCATAAAAGCAA-GATTAAAAGGAACAGTTGGGGGTATT
CATATTCAATAGTTAGAGGTGAAATTCTCGGATTTATGGAAGGTGAACTAGTGCGAAAGC
ATTTACCAAGGATGTTTTCATTAATCAAGAACGAAAGCTAGGGGATCGAAG-AGGCTTAG
ATACCCTCGTAGTCTTAGCTATAAACTATACCGACTAGGGGTTAGTAGAA----------
---------GTCATTGT--------------GTTTCTATTAGTACCTTATGAGAAATCAA
AGTCTTT-GGGTTCCGGGGGGAGTATGGTCGCAAGGCTGAAACTTAAAGGAATTGACGGA
AGGGCACC-ACCAGGAGTGGAGCCTGCGGCTTAATTT-GACTCAACACGGGGAAACTTAC
CAGGTCCAGACATAGGAAGGATTGACAGATTGATAGCTCTTTCTTGATTCTATGGGTGGT
GGTGCATGGCCGTTCTTAGTTGGTGGAGTGATTTGTCTGGTTAATTCCGATAACGAACGA
GACCTCCGCCTGCTAAATAGTATATAT----------------TATTTTTT---------
---------------ATAATGTATACTTCTTAGA--GGGACACTATACGTATGAGTGTAG
GG-AAGCTGGAGGCAATAACAGGTCTGTGATGCCCTTAGATGTTCTGGGCTGCACGCGCG
CGACACTGATCTATTCAACAAGTGACTG--AATCGATA----------------------
---

#AB107966.1_Blastocystis_hominis_Subtype_5
TGAGAACAATGTACAAATGTTATCGATAAACAATTGGAGGGCAAGTCTGGTGCCAGCAGC
CGCGGTAATTCCAGCTCCAATAGCGTATATTAACGTTGTTGCAGTTAAAAAGCTCGTAGT
TGAAATGTGGGATGAA---GTATATGATGAATTTTATATTCAATTATATATTGAT-T---
--CCCCTCTCCAATTTATTAT---TATGGG---TATTAATTTATTTG-------------
-----TAAT-AAGAA-TTG-GTCATTTACTGTGAGAAAATTAGAGTGTTCAAAGCAGGCA
TT--------------TGCTTGAATAGATTAGCATGGAATAATACTAAAAGGCTTTTATG
GTCGATTTAATTGGTTTG--TTCATAAAAGCAA-GATTAAAAGGAACAGTTGGGGGTATT
CATATTCAATAGTTAGAGGTGAAATTCTCGGATTTATGGAAGATGAACTAGTGCGAAAGC
ATTTACCAAGGATGTTTTCATTAATCAAGAACGAAAGCTAGGGGATCGAAG-AGGCTTAG
ATACCCTCGTAGTCTTAGCTATAAACTATACCGACTAGGGGTTAGTAGAA----------
---------GTCATTGT--------------GTTTCTATTAGTACCTTATGAGAAATCAA
AGTCTTT-GGGTTCCGGGGGGAGTATGGTCGCAAGGCTGAAACTTAAAGGAATTGACGGA
AGGGCACC-ACCAGGAGTGGAGCCTGCGGCTTAATTT-GACTCAACACGGGGAAACTTAC
CAGGTCCAGACATAGGAAGGATTGACAGATTGATAGCTCTTTCTTGATTCTATGGGTGGT
GGTGCATGGCCGTTCTTAGTTGGTGGAGTGATTTGTCTGGTTAATTCCGATAACGAACGA
GACCTCCGCCTGCTAAATAGTATATAT----------------TATTTTTT---------
---------------ATAATGTATACTTCTTAGA--GGGACACTATACGTATGAGTGTAG
GG-AAGCTGGAGGCAATAACAGGTCTGTGATGCCCTTAGATGTTCTGGGCTGCACGCGCG
CGACACTGATCTATTCAACAAGTGACTG--AATCGATA----------------------
---

#U51152_Blastocystis_hominis_Subtype_4
TGAGAACAATGTACAAATGTTATCGATAAACAATTGGAGGGCAAGTCTGGTGCCAGCAGC
CGCGGTAATTCCAGCTCCAATAGCGTATATTAACGTTGTTGCAGTTAAAAAGCTCGTAGT
TGAATTGAAGTGAACTT-GGGTTGATGTGATCTTCGGATGACATGAATCAAAGTTGA---
--CTCTTTCCAAAGTCAATA----CATTGG---TATTCATTTATCTT-------------
-----TGTATTGTGT-TTG-GTCATTTACTGTGAGAAAATTAGAGTGTTCAAAGCAGACG
TT--------------TGTTTGAATACATTAGCATGGAATAATCATATATGGCTTTCATG
TT-GATTTGATTGGTTTG--AATATGGAAGCAA-GATTAAAAGGGACAGTTGGGGGTATT
CATATTCAATAGTCAGAGGTGAAATTCTGGGATTTATGGAAGATGAACAAGTGCGAAAGC
ATTTACCAAGGATGTTTTCATTAATCAAGAACGAAAGTTAGGGGATCGAAG-AGGATTAG
ATACCCTCGTAGTCTTAACTATAAACGATACCGACTAGGGGTTAGTAATG----------
---------GTCATTGT--------------GTGTTTACTAGTACCTTATGAGAAATCAA
AGTCTTT-GGGTTCCGGGGGGAGTATGGTCGCAAGGCTGAAACTTAAAGGAATTGACGGA
AGGGCACC-ACCAGGAGTGGAGCCTGCGGCTTAATTT-GACTCAACACGGGGAAACTTAC
CAGGTCCAGACATAGGAAGGATAGACAGAACAA-AGCTCTTTCTTGATTCTATGGGTGGT
GGTGCATGGCCGTTCTTAGTTGGTGGATTGATTTGTCAGGCTAATTCCGATAACGAACGA
GACCTCCTCCTACTAAATAGATATATA----------------TATCTTTG---------
------------GATATATTG-TATCTTCTTAGA--GGGACACTATACACA-AAGTGTAG
GG-AAGCTGGAGGCAATAACAGGTCTGTGATGCCCTTAGATGTCCTGGGCTGCACGCGCG
CGACACTGATTGATTCAACAAGTAGCTG--GGTCGAGA----------------------
---

#AY244621_Blastocystis_hominis_Subtype_4
TGAGAACAATGTACAAATGTTATCGATAAACAATTGGAGGGCAAGTCTGGTGCCAGCAGC
CGCGGTAATTCCAGCTCCAATAGCGTATATTAACGTTGTTGCAGTTAAAAAGCTCGTAGT
TGAATTGAAGTGAACTT-GGGTTGATGTGATCTTCGGATGACATGAATCAAAGTTGA---
--CTCTTTCCAAAGTCAATA----CATTGG---TATTCATTTATCTT-------------
-----TGTATTGTGT-TTG-GTCATTTACTGTGAGAAAATTAGAGTGTTCAAAGCAGACG
TT--------------TGTTTGAATACATTAGCATGGAATAATCATATATGGCTTTCATG
TT-GATTTGATTGGTTTG--AATATGGAAGCAA-GATTAAAAGGGACAGTTGGGGGTATT
CATATTCAATAGTCAGAGGTGAAATTCTGGGATTTATGGAAGATGAACAAGTGCGAAAGC
ATTTACCAAGGATGTTTTCATTAATCAAGAACGAAAGTTAGGGGATCGAAG-AGGATTAG
ATACCCTCGTAGTCTTAACTATAAACGATACCGACTAGGGGTTAGTAATG----------
---------GTCATTGT--------------GTGTTTACTAGTACCTTATGAGAAATCAA
AGTCTTT-GGGTTCCGGGGGGAGTATGGTCGCAAGGCTGAAACTTAAAGGAATTGACGGA
AGGGCACC-ACCAGGAGTGGAGCCTGCGGCTTAATTT-GACTCAACACGGGGAAACTTAC
CAGGTCCAGACATAGGAAGGATAGACAGAACAA-AGCTCTTTCTTGATTCTATGGGTGGT
GGTGCATGGCCGTTCTTAGTTGGTGGATTGATTTGTCAGGCTAATTCCGATAACGAACGA
GACCTCCTCCTACTAAATAGATATATA----------------TATCTTTG---------
------------GATATATTG-TATCTTCTTAGA--GGGACACTATACACA-AAGTGTAG
GG-AAGCTGGAGGCAATAACAGGTCTGTGATGCCCTTAGATGTCCTGGGCTGCACGCGCG
CGACACTGATTGATTCAACAAGTAGCTG--GGTCGAGA----------------------
---

#AB070988_Blastocystis_hominis_Subtype_3
TGAGAACAACGTACAAACCTTATCGATAAACAATTGGAGGGCAAGTCTGGTGCCAGCAGC
CGCGGTAATTCCAGCTCCAATAGCGTATATTAACGTTGTTGCAGTTAAAAAGCTCGTAGT
TGAAATGAAGGGTAGTT-GTGTAATGAATACATTCGTGTATTTTGTTATTCTACTACC--
--CTCCTTCTAAATTCGATA----TATGAG---TATTAATTTACTTG-------------
-----TATATGGT-T-TTA-GACCTTTACTGTGAGAAAATTAGAGTGTTCAAAGCAGGCA
TT--------------TGCTTGAATATATTAGCATGGAATAATCATGTATGATTTTCATG
ATGTATTTGATTGGTTTGG-TTCATGAGAATAA-GATTAAAAGGGACAGTTGGGGGTATT
CATATTCAATAGTCAGAGGTGAAATTCTCGGATTTATGGAAGATGAACAAGTGCGAAAGC
ATTTACCAAGGATGTTTTCATTAATCAAGAACGAAAGTTAGGGGATCGAAG-AGGATTAG
ATACCCTCGTAGTCTTAACTATAAACGATACCGACTAGAGGTTAGTGAAG----------
---------GTCATTGT--------------GTCTTGACTAGTATCTTATGAGAAATCAA
AGTCTTT-GGGTTCCGGGGGGAGTATGGTCGCAAGGCTGAAACTTAAAGGAATTGACGGA
AGGGCACC-ACCAGGAGTGGAGCCTGCGGCTTAATTT-GACTCAACACGGGAAAACTTAC
CAGGTCCAGACATAGGAAGGATAGACAGATTAA-AGCTCTTTCTTGATTCTATGGGTGGT
GGTGCATGGCCGTTCTTAGTTGGTGGATTGATTTGTCAGGCTAATTCCGATAACGAACGA
GACCTCCGCCTGCTAAATGGTTCTCTA----------------TAGT-------------
------------ATTCTATAGGAATCCTCTTAGA--GGGACACTATACATA-AAGTATAG
GG-AAGCTGGAGGCAATAACAGGTCTGTGATGCCCTTAGATGTCCTGGGCTGCACGCGCG
CGACACTGATTCATTCAACAAGTGGCTG--AATCGATA----------------------
---

#AB070986_Blastocystis_hominis_Subtype_3
TGAGAACAACGTACAAACCTTATCGATAAACAATTGGAGGGCAAGTCTGGTGCCAGCAGC
CGCGGTAATTCCAGCTCCAATAGCGTATATTAACGTTGTTGCAGTTAAAAAGCTCGTAGT
TGAAATGAAGGGTAGTT-GTGTAATGAATACATTCGTGTATTTTGTTATTCTACTACC--
--CTCCTTCTAAATTCGATA----TATGAG---TATTAATTTACTTG-------------
-----TATATGGT-T-TTA-GACCTTTACTGTGAGAAAATTAGAGTGTTCAAAGCAGGCA
TT--------------TGCTTGAATATATTAGCATGGAATAATCATGTATGATTTTCATG
ATGTATTTGATTGGTTTGG-TTCATGAGAATAA-GATTAAAAGGGACAGTTGGGGGTATT
CATATTCAATAGTCAGAGGTGAAATTCTCGGATTTATGGAAGATGAACAAGTGCGAAAGC
ATTTACCAAGGATGTTTTCATTAATCAAGAACGAAAGTTAGGGGATCGAAG-AGGATTAG
ATACCCTCGTAGTCTTAACTATAAACGATACCGACTAGAGGTTAGTGAAG----------
---------GTCATTGT--------------GTCTTGACTAGTATCTTATGAGAAATCAA
AGTCTTT-GGGTTCCGGGGGGAGTATGGTCGCAAGGCTGAAACTTAAAGGAATTGACGGA
AGGGCACC-ACCAGGAGTGGAGCCTGCGGCTTAATTT-GACTCAACACGGGAAAACTTAC
CAGGTCCAGACATAGGAAGGATAGACAGATTAA-AGCTCTTTCTTGATTCTATGGGTGGT
GGTGCATGGCCGTTCTTAGTTGGTGGATTGATTTGTCAGGCTAATTCCGATAACGAACGA
GACCTCCGCCTGCTAAATGGTTTTCTA----------------TAGT-------------
------------ATTCTATAGGAATCCTCTTAGA--GGGACACTATACATA-AAGTATAG
GG-AAGCTGGAGGCAATAACAGGTCTGTGATGCCCTTAAATGTCCTGGGCTGCACGCGCG
CGACACTGATTCATTCAACAAGTGGCTG--AATCGATA----------------------
---

#Blastocystis_hominis_Subtype_2_AB070997
TGAGAACAACGTACAACTCTTATCGATAAGCCATTGGAGGGCAAGTCTGGTGCCAGCAGC
CGCGGTAATTCCAGCTCCAATAGCGTATATTAACGTTGTTGCAGTTAAAAAGCTCGTAGT
TGAAGTGAGGGAG---T-GTGTGTTCATGAGAGCTAG---TCTCGAGTGTTCACAACC--
--TCCCCCCTCCAATCGGTGT---AGTGGGG--TATTCAGTTATTTC-------------
-----ACTACTCCT--TTG-GTCGTTTACTGTGAGAAAATTAGAGTGTTCAAAGCGGGCG
TT--------------TGTTTGAATAGATTAGCATGGAATAATGATTGAAGGCTTTCGTG
TTCGATTTGATTGGTTTG--TTCATGGAAGCAA-GGTTAAAAGGAACAGTTGGGGGTATT
CATATTCACTAGTTAGAGGTGAAATTCTCGGATTTATGGAAGATGAACAGGTGCGAAAGC
ATTTACCAAGGATGTTTTCATTAATCAAGAACGAAAGCTAGGGGATCGAAG-AGGATTAG
ATACCCTCGTAGTCTTAGCTATAAACGATACCGACTAGGGGTTAGTAGAG----------
---------GTCAATGT--------------GTCTCTATTAGTACCTTATGAGAAATCAA
AGTCTTT-GGGTTCCGGGGGGAGTATGGTCGCAAGGCTGAAACTTAAAGGAATTGACGGA
AGGGCACC-ACCAGGAGTGGAGCCTGCGGCTTAATTT-GACTCAACACGGGGAAACTTAC
CAGGTCCAGACATAGGAAGGATTGACAGATTGATAGCTCTTTCTTGATTCTATGGGTGGT
AGTGCATGGCCGTTCTTAGTTGGTGGAGTGATTTGTCTGGCTGATTCCGATAACGAACGA
GACCTCCGCCT-TTAACTAGTGTTGGC----------------TATT-------------
------------GTGATAGCTGATACTTCTTGGA--GGGACACTATACGTA-AAGTGTAG
GG-AAGCTGGAGGCAATAACAGGTCTGTGATGCCCTTAGATGTTCTGGGCTGCACGCGCG
CGACACTGATCTATTCAACGAGTGGCTG--TGTCGATA----------------------
---

#AB070987__Blastocystis_hominis_Subtype_2
TGAGAACAACGTACAACTCTTATCGATAAGCCATTGGAGGGCAAGTCTGGTGCCAGCAGC
CGCGGTAATTCCAGCTCCAATAGCGTATATTAACGTTGTTGCAGTTAAAAAGCTCGTAGT
TGAAGTGAGGGAG---T-GTGTGTTCATGAGAGCTAG---TCTCGAGTGTTCACAACC--
--TCCCCCCTCCAATCGGTGT---AGTGGGG--TATTCAGTTATTCT-------------
-----ACTACTCCT--TTG-GTCGTTTACTGTGAGAAAATTAGAGTGTTCAAAGCGGGCG
TT--------------TGTTTGAATAGATTAGCATGGAATAATGATTGAAGGCTTTCGTG
TTCGATTTGATTGGTTTG--TTCATGGAAGCAA-GGTTAAAAGGAACAGTTGGGGGTATT
CATATTCACTAGTTAGAGGTGAAATTCTCGGATTTATGGAAGATGAACAGGTGCGAAAGC
ATTTACCAAGGATGTTTTCATTAATCAAGAACGAAAGCTAGGGGATCGAAG-AGGATTAG
ATACCCTCGTAGTCTTAGCTATAAACGATACCGACTAGGGGTTAGTAGAG----------
---------GTCAATGT--------------GTCTCTATTAGTACCTTATGAGAAATCAA
AGTCTTT-GGGTTCCGGGGGGAGTATGGTCGCAAGGCTGAAACTTAAAGGAATTGACGGA
AGGGCACC-ACCAGGAGTGGAGCCTGCGGCTTAATTT-GACTCAACACGGGGAAACTTAC
CAGGTCCAGACATAGGAAGGATTGACAGATTGATAGCTCTTTCTTGATTCTATGGGTGGT
GGTGCATGGCCGTTCTTAGTTGGTGGAGTGATTTGTCTGGCTAATTCCGATAACGAACGA
GACCTCCGCCT-TTAACTAGTGTTGGC----------------TATT-------------
------------GTGATAGCTGATACTTCTTGGA--GGGACACTATACGTA-AAGTGTAG
GG-AAGCTGGAGGCAATAACAGGTCTGTGATGCCCTTAGATGTTCTGGGCTGCACGCGCG
CGACACTGATCTATTCAACGAGTGGCTG--TGTCGATA----------------------
---

#U51151_Blastocystis_hominis_Subtype_1
TGAGAACAATGTACAACTCTTATCGATAAGCCATTGGAGGGCAAGTCTGGTGCCAGCAGC
CGCGGTAATTCCAGCTCCAATAGCGTATATTAACGTTGTTGCAGTTAAAAAGCTCGTAGT
TGAAGTGTGGGTG---A-TCGCTGTTGTGAGACTTCGGTCTCTCGACAGTAAGTCACC--
--CCCTTCCAGTATCCAGT-----AGTGGG---TATTCAGTTACTT--------------
-----ACTACTGTGTGTTG-GTCCTTTACTGTGAGAAAATTAGAGTGTTCAAAGCAGGCG
TT--------------TGCTTGAATAGATTAGCATGGAATAATAATTGAAGGCTTTCGTG
TTCGATTTGATTGGTTTG--TTCATGGAAGCAA-GGTTAAAAGGAACAGTTGGGGGTATT
CATATTCACTAGTTAGAGGTGAAATTCTCGGATTTATGGAAGATGAACAAGTGCGAAAGC
ATTTACCAAGGATGTTTTCATTAATCAAGAACGAAAGCTAGGGGATCGAAG-AGGATTAG
ATACCCTCGTAGTCTTAGCTATAAACGATACCGACTAGGGGTTAGTAGAG----------
---------GTCAAAGT--------------GTCTTTATTAGTACCTTATGAGAAATCAA
AGTCTTT-GGGTTCCGGGGGGAGTATGGTCGCAAGGCTGAAACTTAAAGGAATTGACGGA
AGGGCACC-ACCAGGAGTGGAGCCTGCGGCTTAATTT-GACTCAACACGGGGAAACTTAC
CAGGTCCAGACATAGGAAGGATTGACAGATTGATAGCTCTTTCTTGATTCTATGGGTGGT
GGTGCATGGCCGTTCTTAGTTGGTGGAGTGATTTGTCTGGCTAATTCCGATAACGAACGA
GACCTCCGCCT-TTAACTAGTGACGTG----------------TATT-------------
------------GTGATATGCGTTGCTTCTTATA--GGGACACTATATGTA-AAATGTAG
GG-AAGCTGGAGGCAATAACAGGTCTGTGATGCCCTTAGATGTTCTGGGCTGCACGCGCG
CGACACTGATCTATTCAACGAGTGGCTG--GGTCGAGA----------------------
---

#AY266472_Blastocystis_hominis_Subtype__8
TGAGAACAAAGTACAATTCTTATCGATAAACAATTGGAGGGCAAGTCTGGTGCCAGCAGC
CGCGGTAATTCCAGCTCCAATAGCGTATATTAATGTTGTTGCAGTTAAAAAGCTCGTAGT
TGAAATGTGTGTTTAATCTTTTTGAACTTATCTTTATGATAGTTTAAATAGTATTAA---
--CACCTTTCCAATTTACTAT---TATGGG---TATTCATTTATTTG-------------
-----TAATTAGTAT-TTG-GTCATTTACTGTGAGAAAATTAGAGTGTTCAAAGCATACG
TTA-----------TACGTTTGAATACATTAGCATGGAATAATAATATAAGGCTTTTATG
GTCGATTTGATTGGTTTA--AGCATAAAAGCAA-GATTAAAAGGGATAGTTGGGGGTATT
CATATTCAATAGTCAGAGGTGAAATTCTCGGATTTATGGAAGATGAACTAGTGCGAAAGC
ATTTACCAAGGATGTTTTCATTAATCAAGAACGAAAGTTAGGGGATCGAAG-AGGATCAG
ATACCCTCGTAGTCTTAACTATAAACGATACCGACTAGAGATTTGTAGAA----------
---------GTCAATGT--------------GTTTCTATAAGCATCTTATGAGAAATCAA
AGTCTTT-GGGTTCCGGGGGGAGTATGGTCGCAAGGCTGAAACTTAAAGGAATTGACGGA
AGGGCACC-ACCAGGAGTGGAGCCTGCGGCTTAATTT-GACTCAACACGGGGAAACTTAC
CAGGTCCAGACATAGGAAGGATTGACAGATTGATAGCTCTTTCTTGATTCTATGGGTGGT
GGTGCATGGCCGTTCTTAGTTGGTGGGGTGACTTGTCTGGCTAATTCCGATAACGAACGA
GACCTCCGCCTATTAAATAGTATATTA----------------TATCTTGT---------
------------AT-ATAATTTATACTTCTTAAA--GGGACACTATACGTTTTAGTGTAG
GG-AAGCTGGAGGCAATAACAGGTCTGTGATGCCCTTAGATGTTCTGGGCTGCACGCGCG
CGACACTGATATATTCAACAAGTAGCTG--TATCGATA----------------------
---
